# Supplementary material for: In situ growth of CuS and Cu1.8S nanosheet arrays as efficient counter electrodes for quantum dot-sensitized solar cells
Source: Royal Society of Chemistry journal article supplement (doi:10.1039/c5ta00390c), 2015-01-01
Supplement: c5ta00390c1.pdf [file c5ta00390c1.pdf]

## Supporting Information

### *In Situ* Growth of CuS and Cu<sub>1.8</sub>S Nanosheet Arrays as Efficient Counter Electrodes for Quantum Dot-Sensitized Solar Cells

Meidan Ye,<sup>a</sup> Xiaoru Wen,<sup>b</sup> Nan Zhang,<sup>b</sup> Wenxi Guo,<sup>a</sup> Xiangyang Liu,<sup>a</sup> Changjian Lin,<sup>\*ab</sup>

<sup>a</sup>Research Institute for Soft Matter and Biomimetics, School of Physics and Mechanical & Electrical Engineering, Xiamen University, Xiamen, 361005, China

<sup>b</sup>State Key Laboratory of Physical Chemistry of Solid Surfaces, and Department of Chemistry, College of Chemistry and Chemical Engineering, Xiamen University, Xiamen, 361005, China

\*To whom correspondence should be addressed. Email: [cjlin@xmu.edu.cn](mailto:cjlin@xmu.edu.cn)

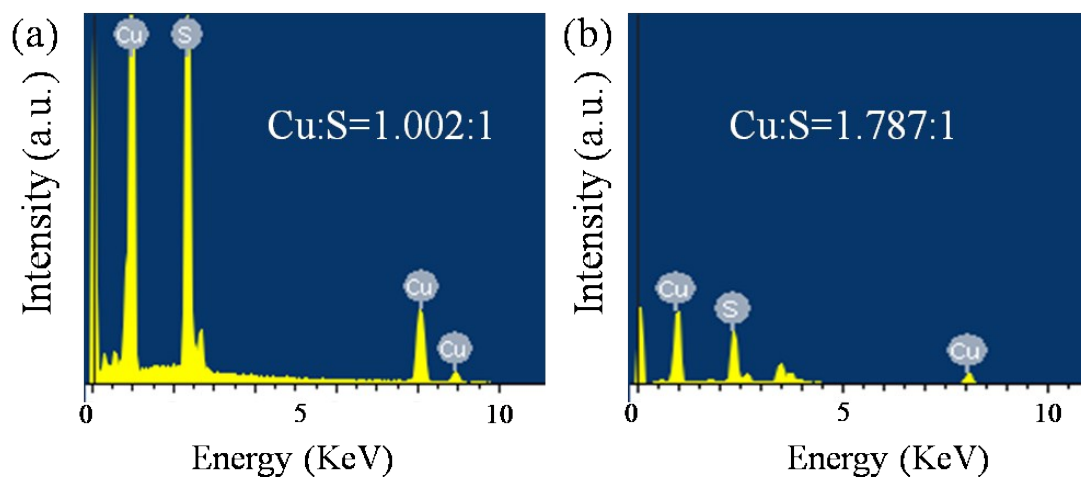

**Fig. S1** EDS results of (a) CuS and (b) Cu<sub>1.8</sub>S CEs.

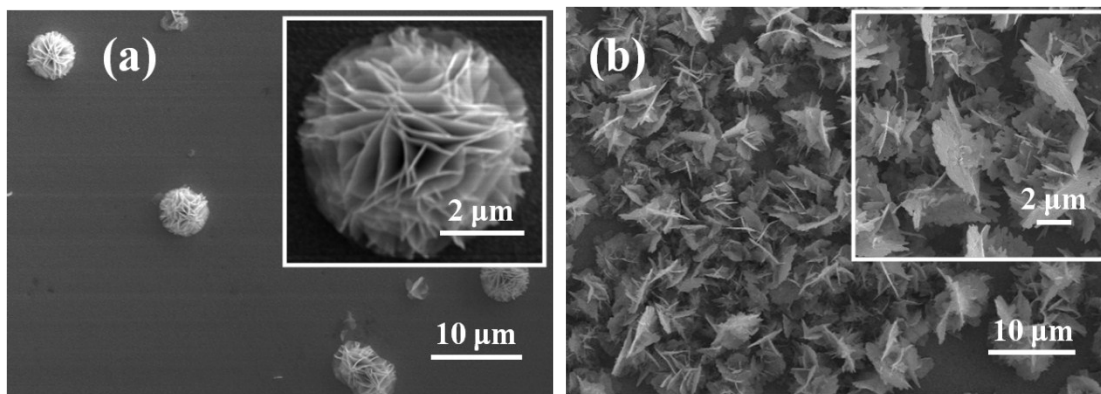

**Fig. S2** SEM images of CuS products prepared at other different conditions: (a) the FTO substrate without seeding treatment, (b) the FTO substrate seeded via drop cast method. Insets are the magnified images of (a, b), respectively.

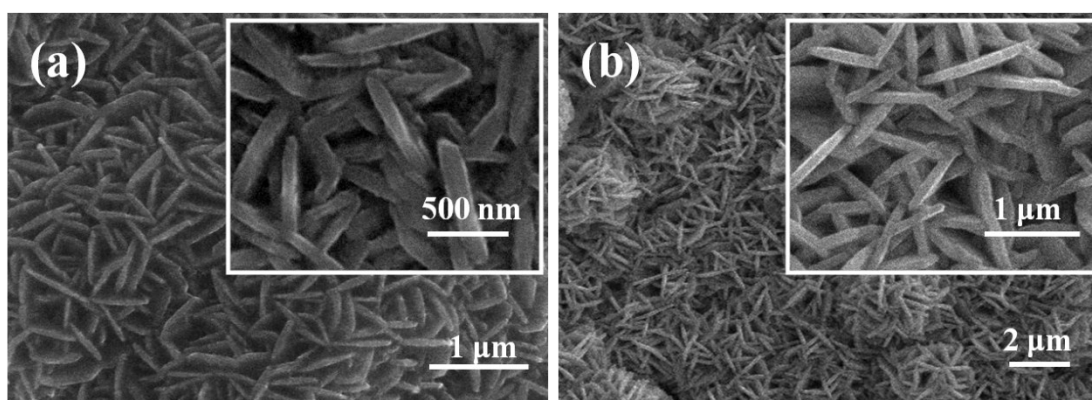

**Fig. S3** SEM images of CuS nanosheets grown on FTO substrates via solvothermal process in 40 mL ethanol containing (a) 0.6 g  $\text{Cu}(\text{NO}_3)_2$ , 0.8 g thiourea, at 150 °C for 24 h; (b) 0.3 g  $\text{Cu}(\text{NO}_3)_2$ , 0.4 g thiourea, at 180 °C for 24 h. The FTO substrates were seeded CuS via spin coating method; insets are the corresponding magnified images of (a, b), respectively.

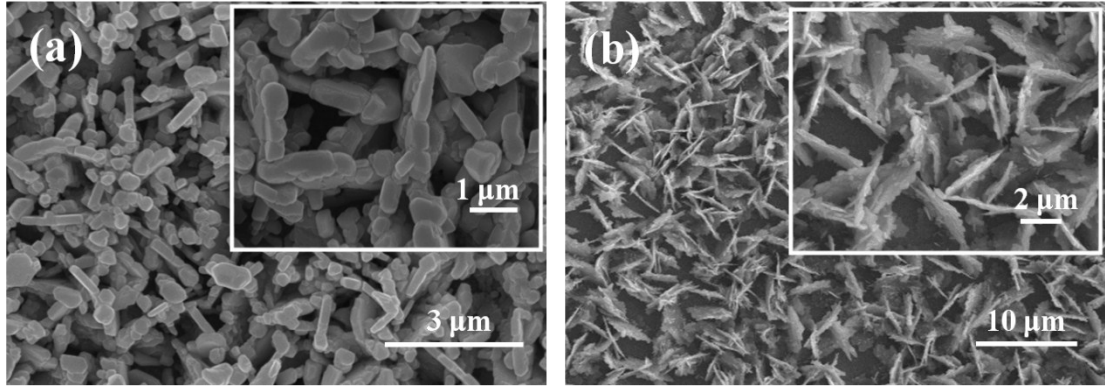

**Fig. S4** SEM images of  $\text{Cu}_{1.8}\text{S}$  nanosheets grown on FTO substrates via solvothermal process in 40 mL ethanol containing (a) 0.25 g  $\text{CuCl}$ , 0.4 g thiourea, at 180 °C for 24 h; (b) 0.25 g  $\text{CuCl}$ , 0.4 g thiourea, at 150 °C for 12 h. The FTO substrates were all seeded  $\text{CuS}$  via spin coating method; insets are the corresponding magnified images of (a, b), respectively.

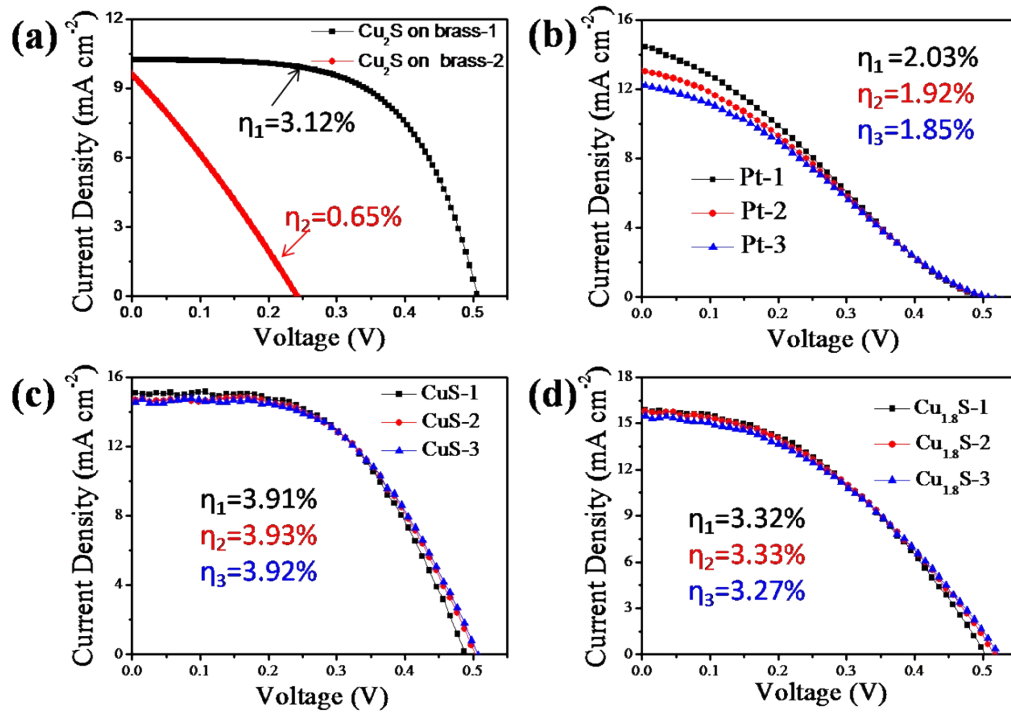

**Fig. S5**  $J$ - $V$  curves of the QDSSCs based on different CEs with several tests in a period time of about 3 hours: (a)  $\text{Cu}_2\text{S}$  on brass, (b) Pt, (c)  $\text{CuS}$ , and (d)  $\text{Cu}_{1.8}\text{S}$ .
